# Supplementary material
Source: PubMed Central journal article supplement (PMC2854813)
Supplement: NIHMS28223-supplement-SuppInfo.pdf [file NIHMS28223-supplement-SuppInfo.pdf]

## SUPPORTING INFORMATION

### **Asymmetric reduction of activated alkenes by pentaerythritol tetranitrate reductase: specificity and control of stereochemical outcome by reaction optimisation**

Anna Fryszkowska,<sup>a</sup> Helen Toogood,<sup>b</sup> Michiyo Sakuma,<sup>b</sup> John M. Gardiner,<sup>a</sup> Gill M. Stephens,<sup>c\*</sup> Nigel S. Scrutton<sup>b\*</sup>

<sup>a</sup> Manchester Interdisciplinary Biocentre, School of Chemistry, University of Manchester, 131 Princess Street, Manchester M1 7DN, U.K.

<sup>b</sup> Manchester Interdisciplinary Biocentre, Faculty of Life Sciences, University of Manchester, 131 Princess Street, Manchester M1 7DN, U.K. Fax: (+44)-161-306-8918; phone: (+44)-161-306-5152; e-mail: nigel.scrutton@manchester.ac.uk

<sup>c</sup> Manchester Interdisciplinary Biocentre, School of Chemical Engineering and Analytical Sciences, University of Manchester, 131 Princess Street, Manchester M1 7DN, U.K. Fax: (+44)-161-306-8918; phone: (+44)-161-306-4377; e-mail: gill.stephens@manchester.ac.uk

**Supporting Figure S1.** Steady-state kinetic data for the reduction of  $\alpha,\beta$ -unsaturated activated alkenes with PETN reductase. Reactions (0.3 ml) were performed in buffer (50 mM  $\text{KH}_2\text{PO}_4/\text{K}_2\text{HPO}_4$  pH 7.0) containing NADPH (100  $\mu\text{M}$ ), oxidizing substrate (2.5  $\mu\text{M}$  to 50 mM), PETNR (12-2000  $\mu\text{M}$ ) and 5 % ethanol to solubilise the substrates. The reactions were followed continuously by monitoring NADPH oxidation at 340 nm for 2 minutes at 25°C. Reactions with oxidizing substrates that absorbed at 340 nm were monitored at 365 nm.

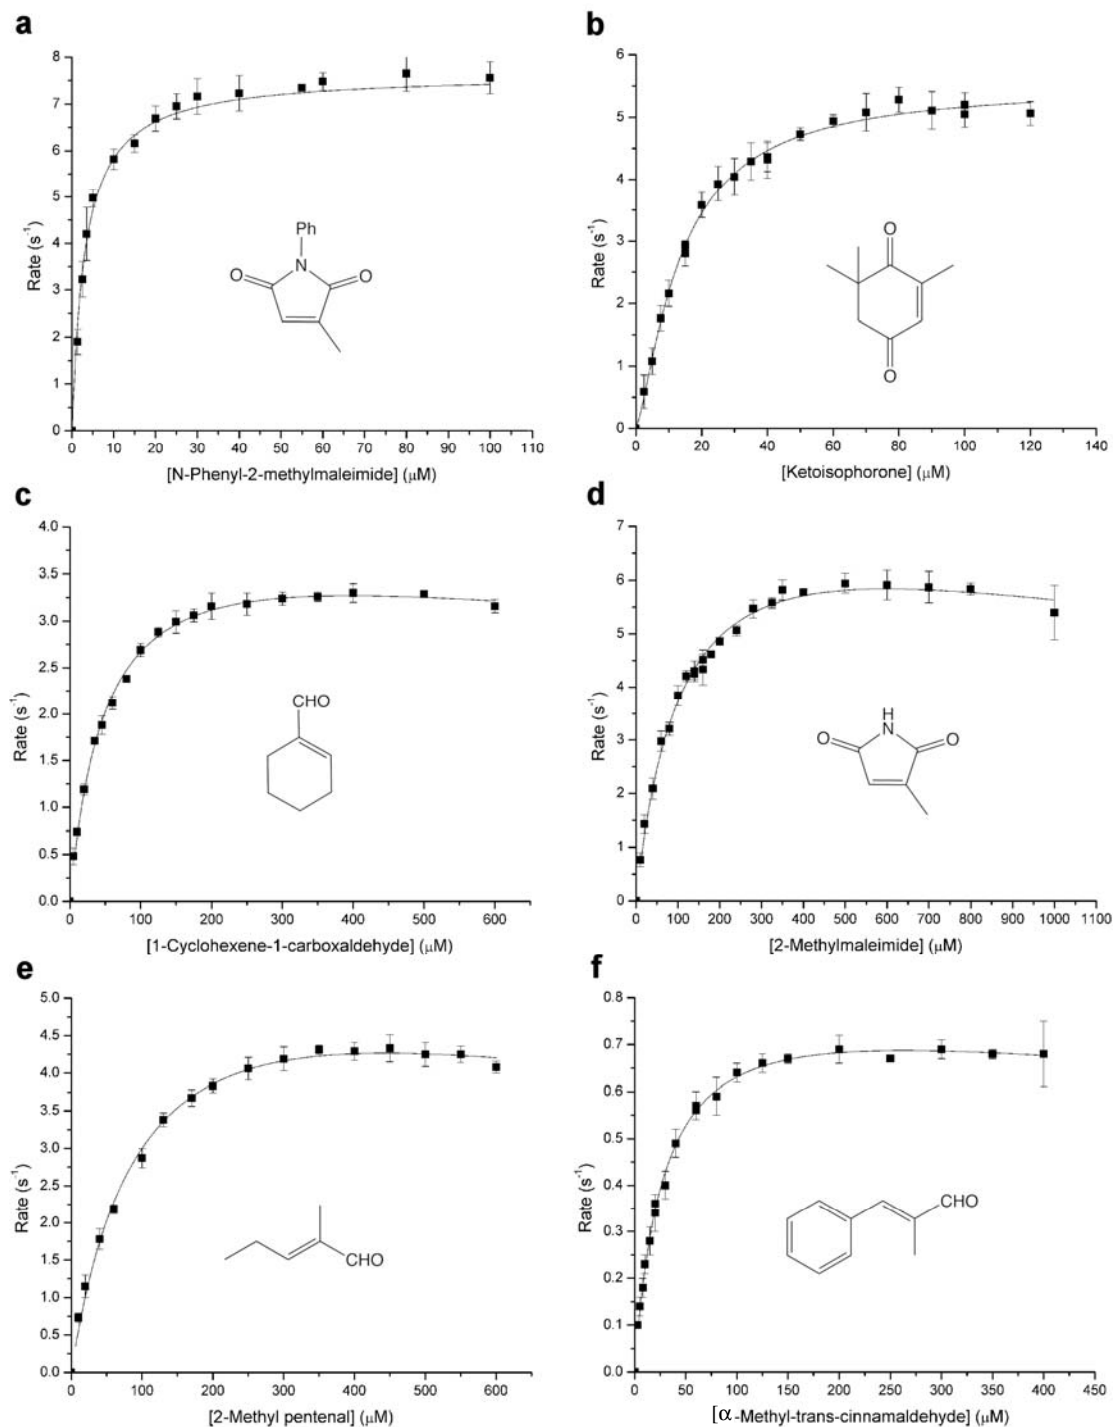

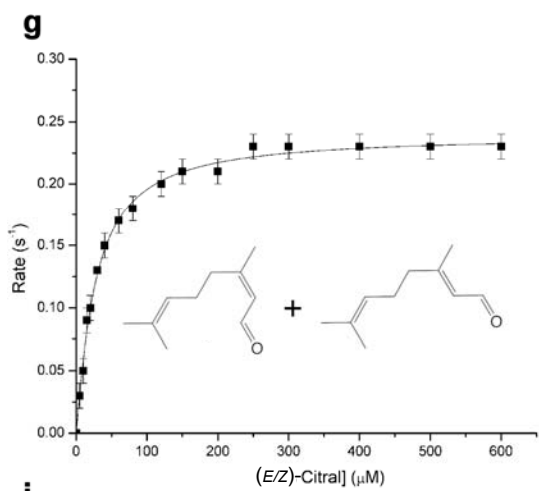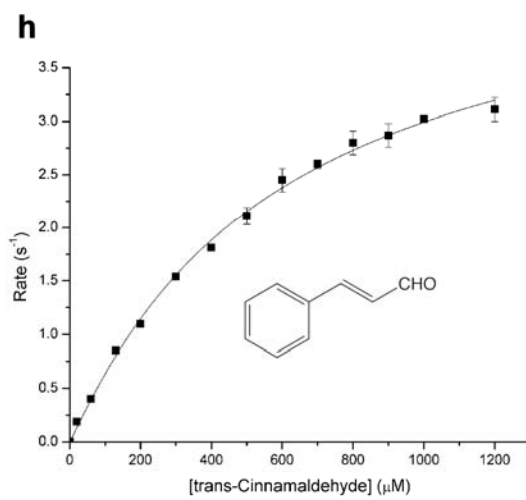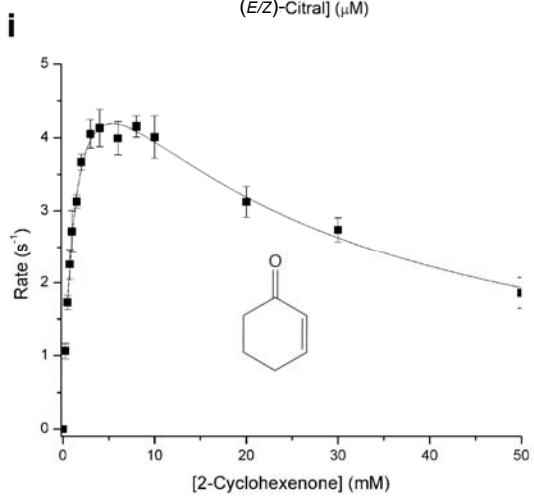

**Supporting Figure S2.** Models of the active site of isomers of (*E/Z*)-citral **11b**: (a): (*E*)-geranial ((*E*)-**11a**) and (b): (*Z*)-neral ((*Z*)-**11a**) into the active site of PETNR. The position of (2-CH) is derived from a superimposition of the 2-cyclohexenone (**4a**)-PETNR structure onto the model (pdb code 1GVQ).<sup>[1]</sup> The modelling of (*E*)-geranial (Figure 1a) indicates significant clashes of the substrate with T26 residue. All residues, FMN and substrates were shown as atom coloured sticks with green, yellow and magenta carbons, respectively.

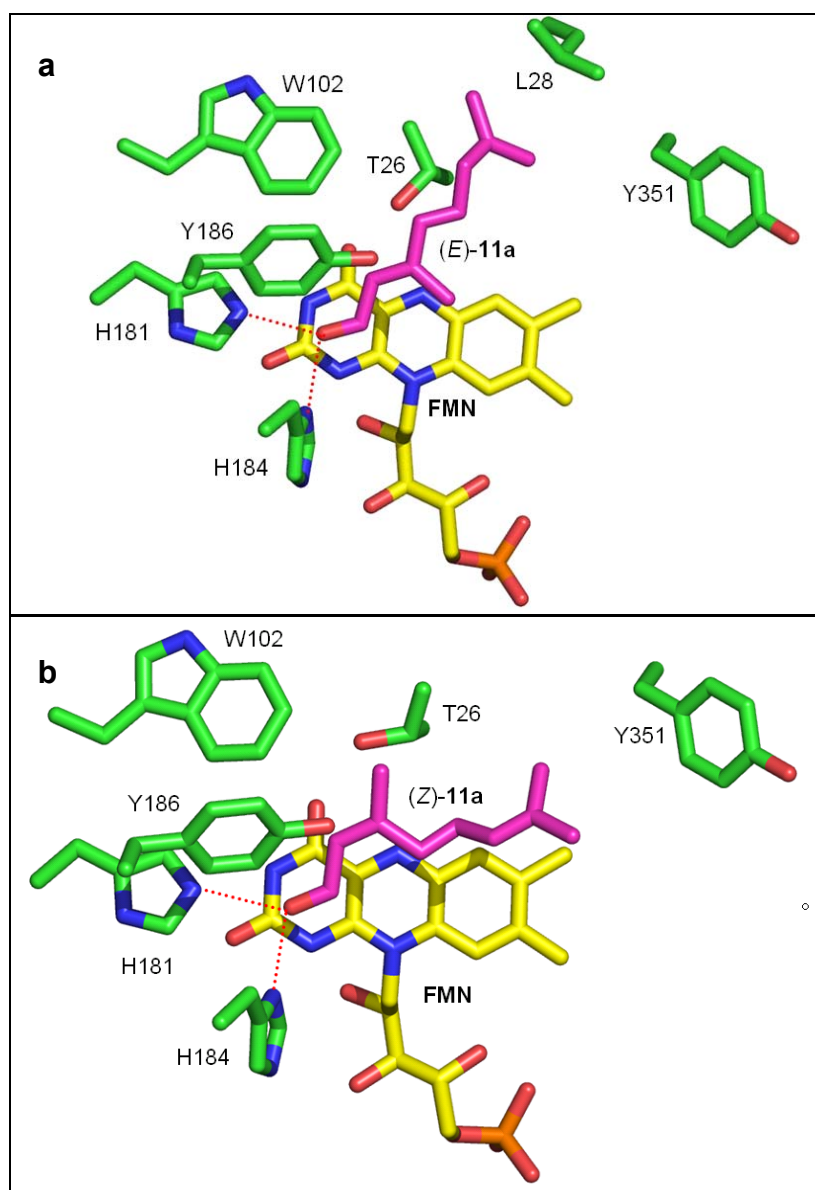

**Supporting Figure S3.** The effect of time on the reduction of ketoisospherone **3a** and product racemisation catalysed by PETNR (0.02  $\mu\text{M}$  enzyme concentration): ■ - conversion;  $\Delta$  - ee;  $\circ$  - yield.

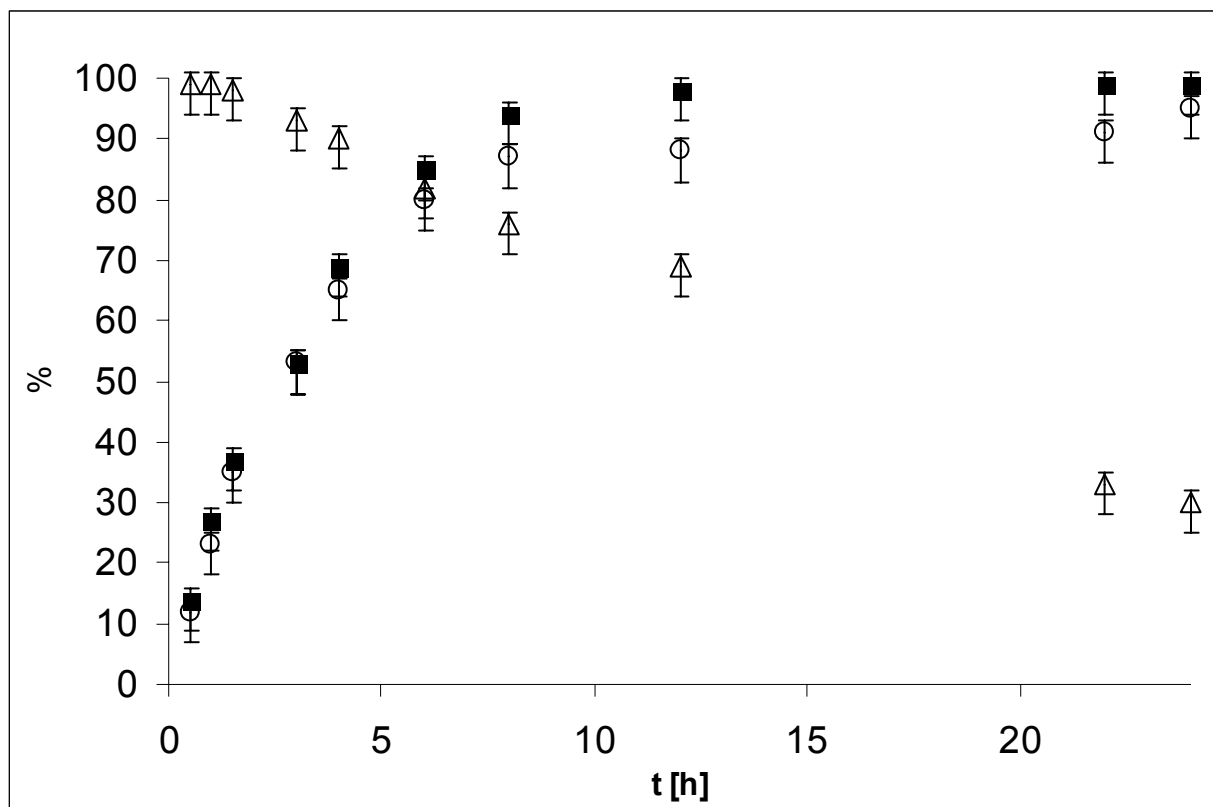

**Table S1.** The effect of time on the reduction of ketoisopherone **3a** and product racemisation catalysed by PETNR (2  $\mu$ M enzyme concentration).<sup>a</sup>

| Entry | Time (h) | Conv. <sup>b</sup> (%) | Yield <sup>b</sup> (%) | Ee <sup>c</sup> (%) |
|-------|----------|------------------------|------------------------|---------------------|
| 1     | 0.5      | >99                    | 98                     | 97                  |
| 2     | 1        | >99                    | >99                    | 95                  |
| 3     | 1.5      | >99                    | >99                    | 93                  |
| 4     | 2        | >99                    | 97                     | 92                  |
| 5     | 3        | >99                    | 97                     | 87                  |
| 6     | 4        | >99                    | 97                     | 83                  |
| 7     | 6        | >99                    | 97                     | 72                  |
| 8     | 8        | >99                    | 97                     | 70                  |
| 10    | 14       | >99                    | 97                     | 48                  |
| 12    | 24       | >99                    | 97                     | 24                  |

<sup>a</sup>) alkene **3a** (5 mM), PETNR (2 $\mu$ M), NADPH (6 mM) in phosphate buffer (50 mM, pH 7.0, 1 mL total volume), 30 °C at 130 rpm, 2h. Alkene **3a** was added as a DMF solution (2% final DMF solution),<sup>b</sup>) by GC using DB-Wax column; <sup>c</sup>) by GC using Chirasil-DEX-CB.

**Supporting Figure S4.** The effect of time on the reduction of ketoisopherone **3a** and product racemisation catalysed by PETNR (2  $\mu$ M enzyme concentration): ■ - conversion;  $\Delta$  - ee;  $\circ$  - yield.

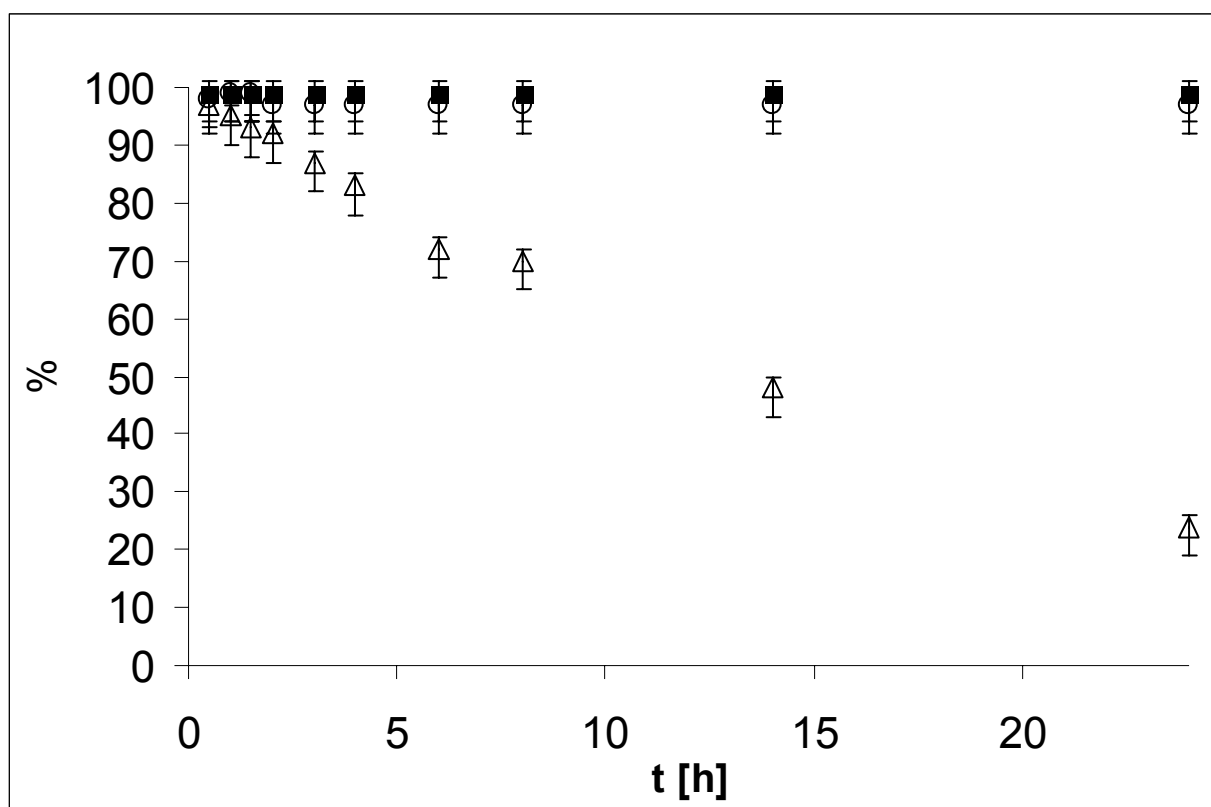

## REFERENCES

- [1] H. Khan, R. J. Harris, T. Barna, D. H. Craig, N. C. Bruce, A. W. Munro, P. C. Moody, N. S. Scrutton, *J. Biol. Chem.* **2002**, *277*, 21906-21912.
